# Supplementary material for: Using the structure of genome data in the design of deep neural networks for predicting amyotrophic lateral sclerosis from genotype
Source: PubMed Central journal article supplement — Bioinformatics. 2019 Jul 5;35(14):i538–47. doi: 10.1093/bioinformatics/btz369 (PMC6612814; doi:10.1093/bioinformatics/btz369), 2019-07-05
Supplement: btz369_supplementary_data.pdf [file btz369_supplementary_data.pdf]

## A Details of the network architecture

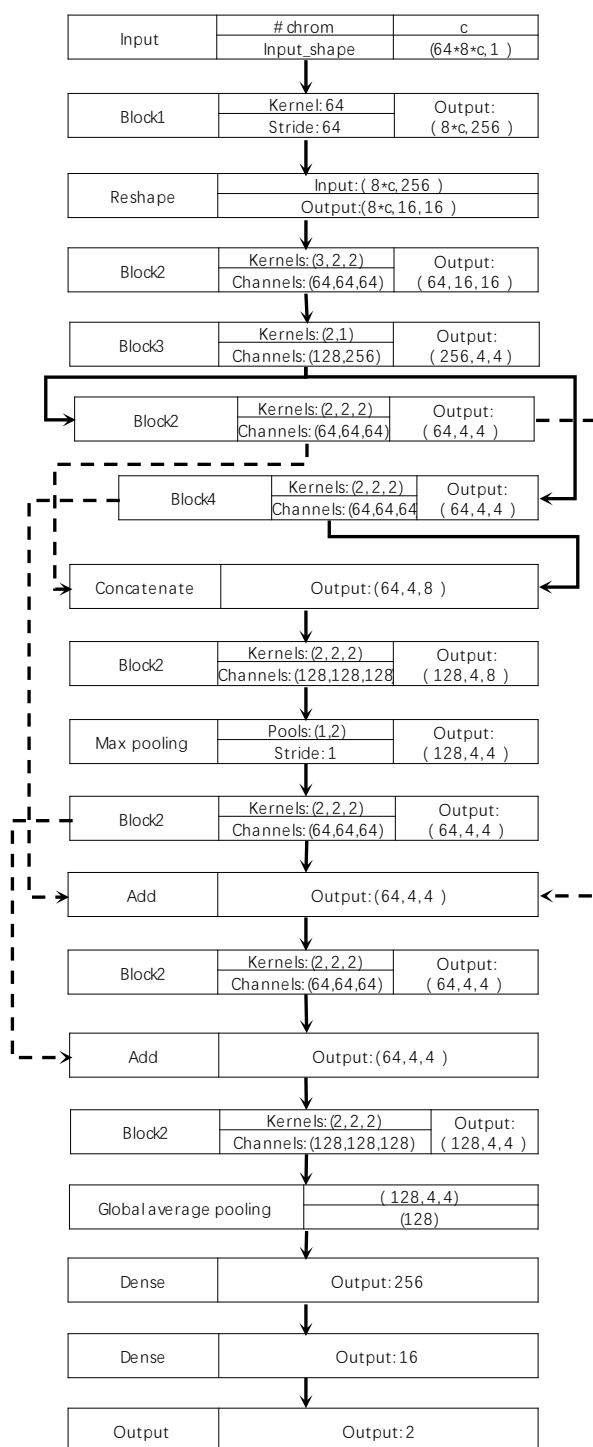

**Fig. 6.** Architecture of ALS-Net. The details of Block 1, Block 2, Block 3 and Block 4 are provided in Figures 7, 8, 9 and 10, respectively.

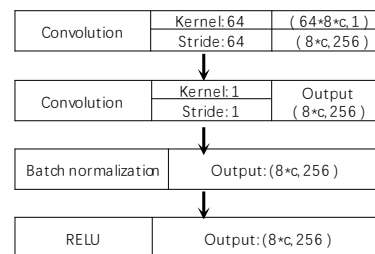

**Fig. 7.** Network architecture of Block 1.  $c$  is the number of chromosomes included in the model.

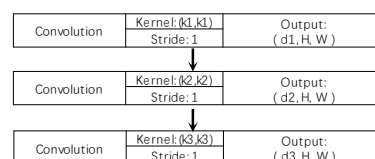

**Fig. 8.** Network architecture of Block 2. Inputs are given by “Kernels”= $(k_1, k_2, k_3)$  and “Channels”= $(d_1, d_2, d_3)$  in Figure 6, and the shape of the input tensor is  $(d_0, H, W)$ .

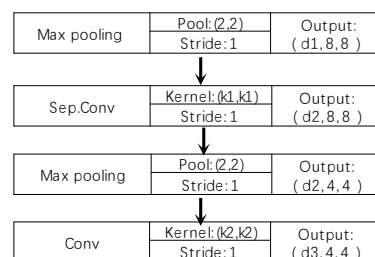

**Fig. 9.** Network architecture of Block 3. Inputs are given by “Channels”= $(d_1, d_2, d_3)$  in Figure 6. Sep.Conv. = separable convolution layer (Gao et al., 2018).

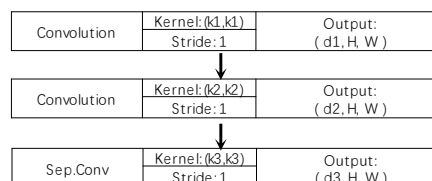

**Fig. 10.** Network architecture of Block 4. Inputs are given by “Kernels”= $(k_1, k_2, k_3)$  and “Channels”= $(d_1, d_2, d_3)$  in Figure 6, and the shape of the input tensor is  $(d_0, H, W)$ . Sep.Conv. = separable convolution layer (Gao et al., 2018).

## B Performance of alternative network architectures

Table 5. The effect of small changes in network architecture on the classification performance for chromosome 7. Acc.=accuracy, Prec.=precision, Sep. Conv.=separable convolution, Conv.=convolution. \* the layers have 1024 nodes,  $1024 \times 16$  nodes and 240 nodes, respectively, with a SELU, a RELU and a SELU activation function, respectively.

| Model change                                                | Acc.  | Prec. | Recall | F1 score |
|-------------------------------------------------------------|-------|-------|--------|----------|
| Block 1: change output size from $(8c, 256)$ to $(8c, 128)$ | 0.656 | 0.720 | 0.510  | 0.597    |
| Block 4: change Sep. Conv. into Conv.                       | 0.638 | 0.683 | 0.515  | 0.588    |
| First dense layer: 128 nodes                                | 0.662 | 0.704 | 0.559  | 0.623    |
| Set learning rate = 0.005                                   | 0.666 | 0.699 | 0.583  | 0.636    |
| Select 4 best promoter regions                              | 0.672 | 0.670 | 0.679  | 0.674    |
| Select 12 best promoter regions                             | 0.681 | 0.677 | 0.691  | 0.684    |
| Three-layer MLP*                                            | 0.628 | 0.711 | 0.430  | 0.536    |

**C Classification accuracies of known ALS genes**

Table 6. Accuracies for ALS-associated genes of chromosomes 7, 9 and 17 as listed on <http://alsod.iop.kcl.ac.uk/> (Abel et al., 2013). The ALS-associated genes from Abel et al. (2013) for chromosome 22 were not kept in our dataset after QC, and hence no results are reported.

| Chr   | Gene     | Accuracy |
|-------|----------|----------|
| Chr7  | GARS     | 0.5159   |
|       | RAMP3    | 0.503    |
|       | ZNF746   | 0.524    |
|       | DPP6     | 0.532    |
| Chr9  | SUSD1    | 0.504    |
|       | ALAD     | 0.513    |
|       | STEX     | 0.545    |
| Chr17 | MAPT     | 0.514    |
|       | SLC39A11 | 0.511    |

**D Gene ontology of selected chromosome 7 promoter regions**

Table 7. Gene ontology terms of the promoter regions that were selected by Promoter-CNN for chromosome 7.

| Gene         | Gene ontology class(es)                                                                                                                                           |
|--------------|-------------------------------------------------------------------------------------------------------------------------------------------------------------------|
| LAMB4        | Basement membrane, cell adhesion                                                                                                                                  |
| LOC105375113 | None - RNA Gene, affiliated with the ncRNA class                                                                                                                  |
| LOC105375607 | None - RNA Gene, affiliated with the ncRNA class                                                                                                                  |
| TRY2P        | None - trypsinogen-like pseudogene                                                                                                                                |
| TYW1B        | tRNA processing, FMN binding, metal ion binding, 4 ion 4 sulfur cluster binding, oxidation-reduction process, tRNA-4-demethylwyosine synthase activity            |
| LOC101929756 | None - RNA Gene, affiliated with the ncRNA class                                                                                                                  |
| DTX2         | None for homo sapiens. For other organisms: metal ion binding, zinc ion binding, protein ubiquitination, notch signaling pathway, cellular component, nucleoplasm |
